# Supplementary material for: Application of Enhanced Sampling Monte Carlo Methods for High-Resolution Protein-Protein Docking in Rosetta
Source: PubMed Central journal article supplement (PMC4459952; doi:10.1371/journal.pone.0125941), 2015-06-08
Supplement: pone.0125941.s001.pdf [file pone.0125941.s001.pdf]

## Supporting Information

# Application of enhanced sampling Monte Carlo methods for high-resolution protein-protein docking in Rosetta

Zhe Zhang, Christina E.M. Schindler, Oliver F. Lange and Martin Zacharias

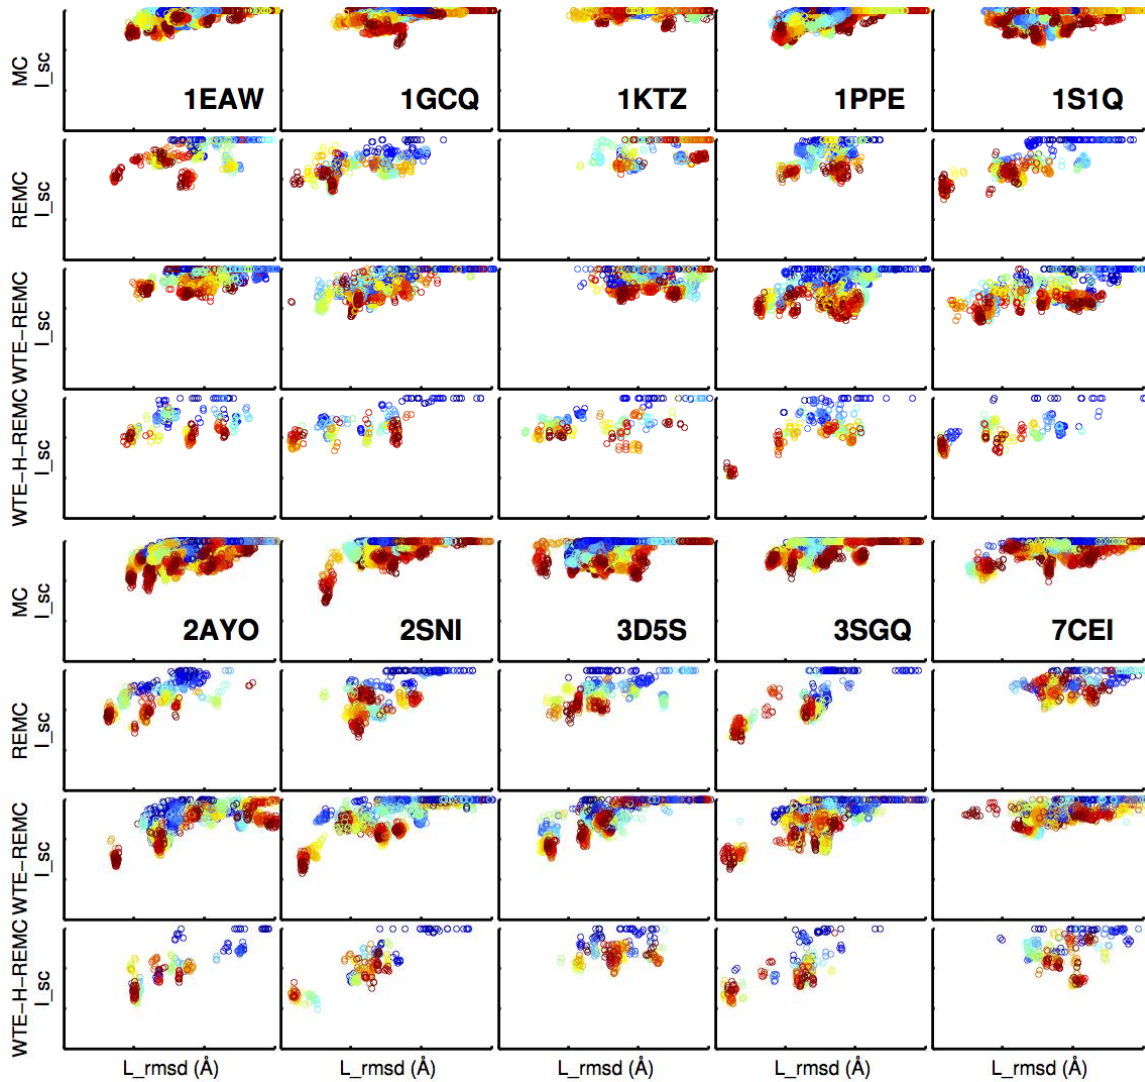

Figure A.

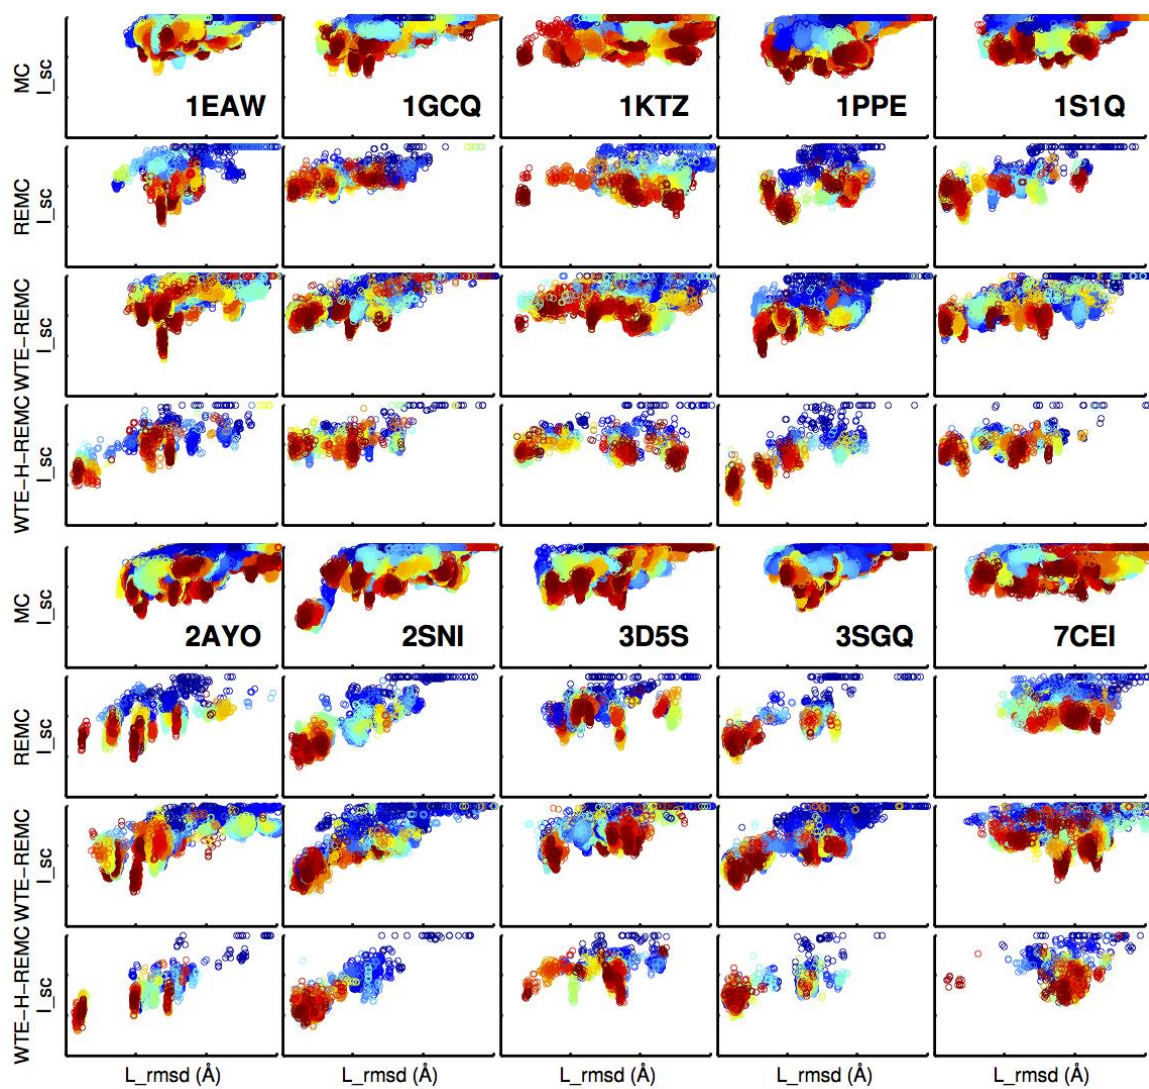

**Figure B.**

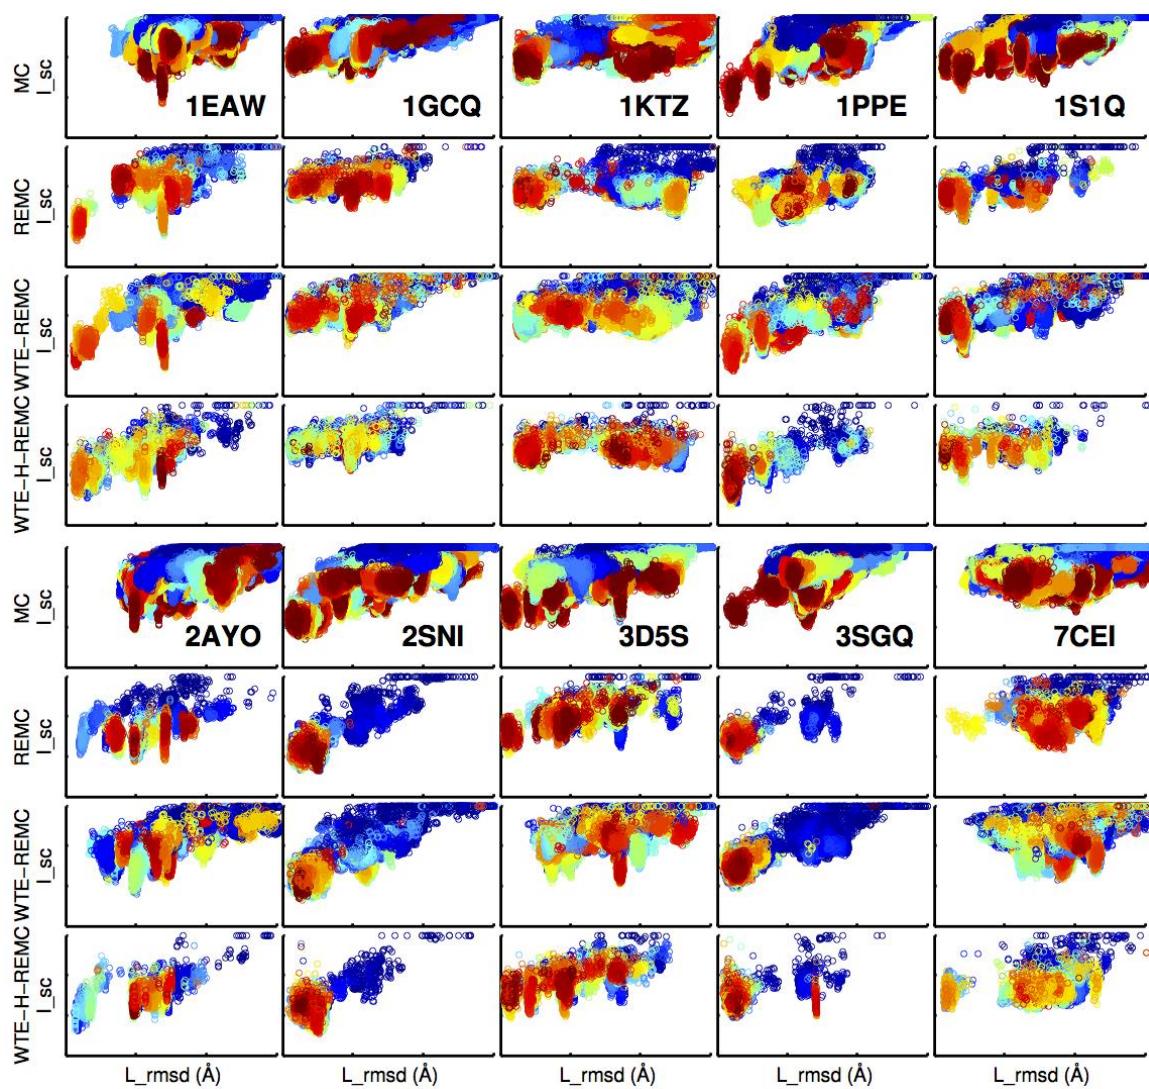

**Figure C.**

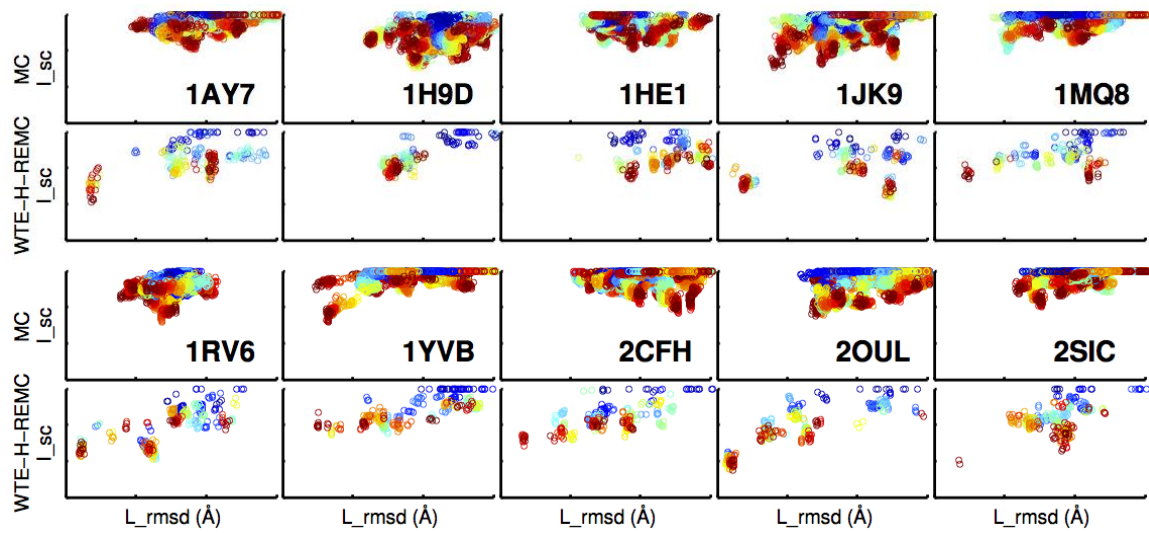

**Figure D.**



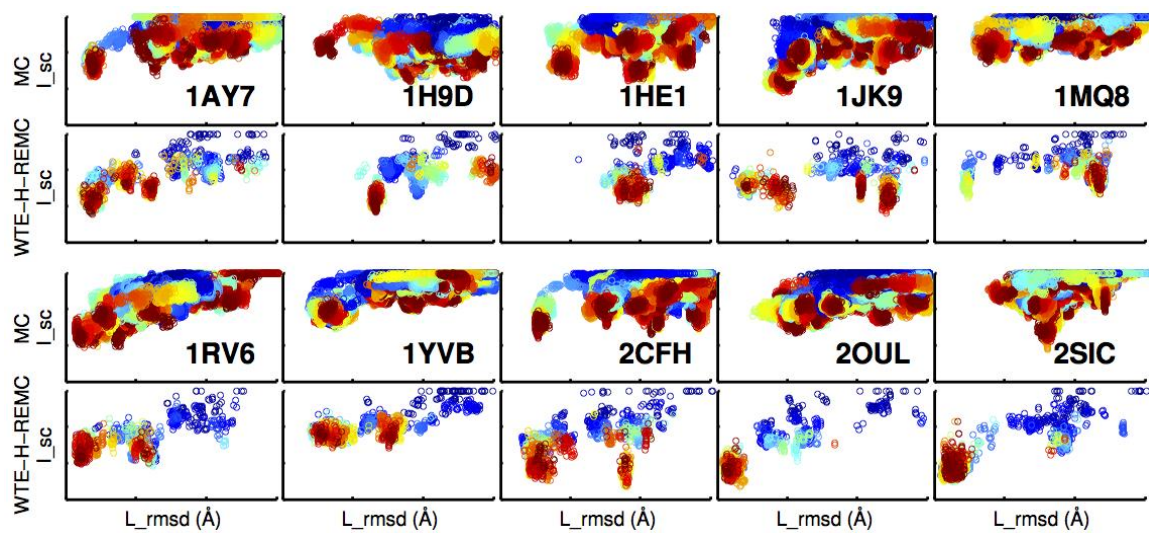

**Figure E.**

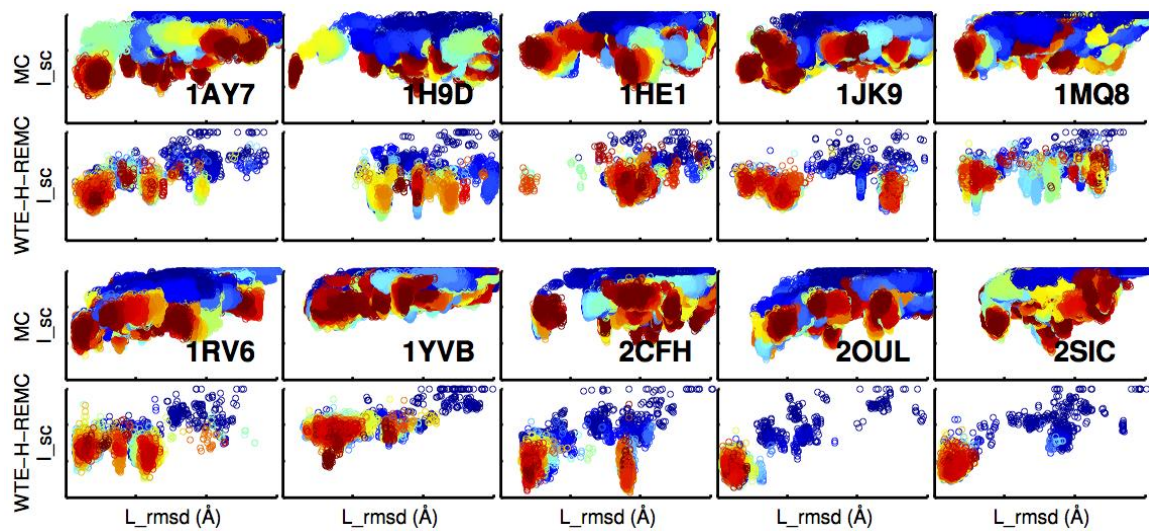

**Figure F.**
